# Supplementary material
Source: PubMed Central journal article supplement (PMC5490734)
Supplement: BLT-15-369_suppl.pdf [file BLT-15-369_suppl.pdf]

**Supplementary Content**

**Literature search strategy: MEDLINE** (accessed via PubMed on Nov 23, 2015)

("anticoagulants"[All Fields] OR "heparin\*" [All Fields] OR "heparin\*" [tiab] OR "heparin" [MeSH Terms] OR "fondaparinux" [tiab] OR "anticoagulant\*" [tiab] OR "warfarin" [tiab] OR "acenocumarol" [tiab] OR "coumarins" [MeSH Terms] OR "phenprocoumon" [tiab] OR "rivaroxaban" [tiab] OR "dabigatran" [tiab] OR "apixaban" [tiab]) AND ("parenteral nutrition, total" [MeSH Terms] OR "total parenteral nutrition" [All Fields] OR "parenteral nutrition" [tiab] OR "parenteral nutrition" [MeSH Terms] OR "parenteral nutrition" [All Fields]) (n=392).

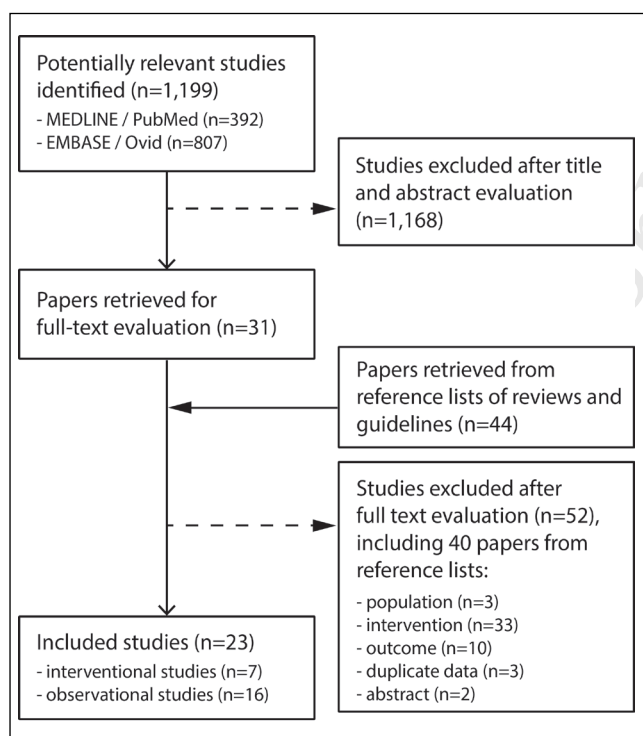

**Supplementary Figure 1** - Overview of the included and excluded papers.

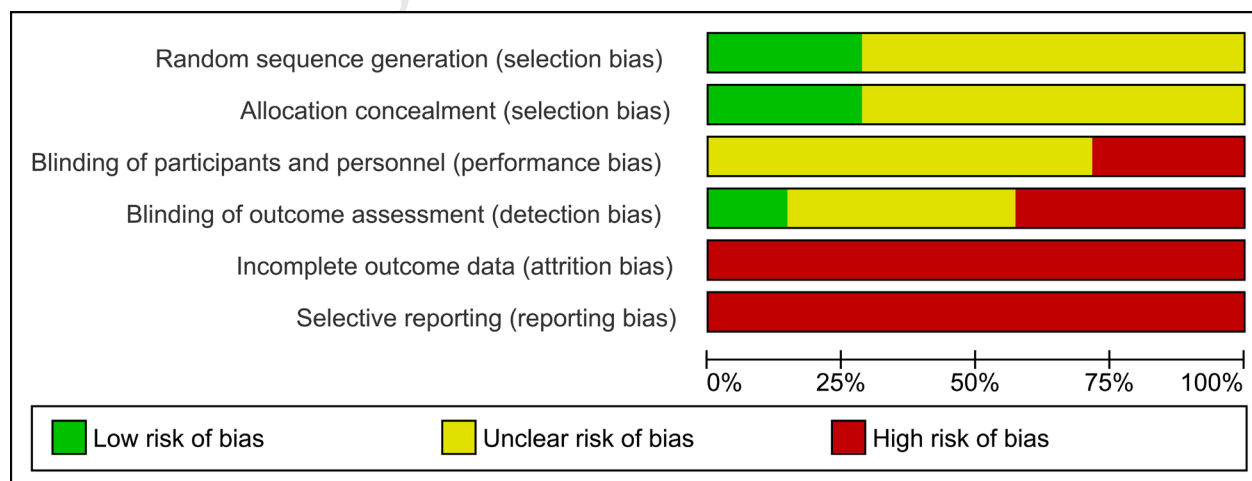

**Supplementary Figure 2** - Summary of risk of bias in interventional studies. The "Risk of bias" figure was drawn on the basis of the indications provided by the Cochrane Collaborations and using the model available in RevMan software.

Supplementary Table 1 - Baseline characteristics of the observational studies.

| Study                              | Population          | Central venous access                                                  | Patients, n (♂, age) <sup>a</sup> | Treatment                                                                                                              | Follow-up                                                                     | Outcome                                        |
|------------------------------------|---------------------|------------------------------------------------------------------------|-----------------------------------|------------------------------------------------------------------------------------------------------------------------|-------------------------------------------------------------------------------|------------------------------------------------|
| Dollery, 1994 (r) <sup>25</sup>    | Children            | Hickman or Broviac CVC                                                 | 32 (na; 0-13)                     | UFH 1 unit/mL (n=8), no heparin (n=24)                                                                                 | Range 0.4-7 years                                                             | (A)symptomatic PE, AC prevalence               |
| Andrew, 1995 (cs) <sup>21</sup>    | Children            | Single-lumen, thick-walled silicone rubber                             | 12 (6; 0-6)                       | Warfarin (different length and INR target)                                                                             | Not available                                                                 | AC prevalence                                  |
| Newall, 2003 (p) <sup>29</sup>     | Children            | Not available                                                          | 8 (na; 0-17)                      | INR-adjusted warfarin (INR target 2.0-3.0 or 1.3-2.0; n=8)                                                             | 15.2 warfarin years (mean 691.6 days; median 817; range 186-1,025)            | Pharmacological study, quality of AC treatment |
| Vegting, 2012 (r-p) <sup>36</sup>  | Children            | Subcutaneous tunnelled single- or double-lumen central lines and ports | 32 (na; 0-17)                     | Nadroparin 80 IU/kg or acenocoumarol (n=18); no AC (n=27)                                                              | Median 25 months (range 2-167)                                                | (A) symptomatic CRT, bleeding, AC prevalence   |
| Ladefoged, 1981 (r) <sup>28</sup>  | Adults and children | Polyvinyl chloride or Broviac CVC                                      | 70 (33; 46, 6-69)                 | Phenprocoumon or UFH 5,000 IU bid                                                                                      | Median 4.5 months (range 1-63)                                                | Symptomatic CRT, AC prevalence                 |
| Schmidt-S, 1990 (r) <sup>32</sup>  | Adults and children | Broviac CVC (different venous access)                                  | 35 (na; 0-23)                     | UFH (1 IU/mL, PN solution)                                                                                             | Mean 577 days (range 58-2,633)                                                | Symptomatic PE, AC prevalence                  |
| Imperial, 1983 (r) <sup>27</sup>   | Adults              | Hickman CVC                                                            | 1010                              | UFH <6,000 IU/day (n=129); 6,000 IU/day (n=858); no AC (n=23)                                                          | Mean 25 days (2-56) in low-dose UFH; mean 14 days (2-42) in high-dose UFH     | (A)symptomatic CRT, AC prevalence              |
| Bern, 1986 (p) <sup>22</sup>       | Adults              | Silicone rubber Hickman or Broviac CVC                                 | 26                                | UFH 2000 IU/day flushes (all patients). Warfarin 2.0 mg qd (n=13); no warfarin (n=13)                                  | Warfarin 3,235 days; no warfarin 2,763                                        | Symptomatic CRT, AC prevalence                 |
| Veerabagu, 1994 (r) <sup>35</sup>  | Adults              | Not available                                                          | 90 (47; 50)                       | Mididose warfarin 1-2 mg/day (n=53), INR-adjusted warfarin (n=18), no warfarin (n=46); UFH 6,000 IU/day (all patients) | 1,312 months (mini-dose), 619 months (INR-adjusted), 931 months (no warfarin) | Symptomatic CRT, AC prevalence                 |
| Duerksen, 1996 (r) <sup>36</sup>   | Adults              | Permanent CVC (Hickman n=38, venous access discs n=9)                  | 47 (43; 36)                       | Warfarin 1 mg/day vs (n=9), no warfarin (n=40)                                                                         | Mean 6.3 months                                                               | Symptomatic CRT, bleeding, AC prevalence       |
| Cowl, 2000 (p) <sup>23</sup>       | Adults              | PICC vs CVC                                                            | 102 (56; 21-88)                   | UFH flushes with 3 mL (UFH 100 IU/ml), systemic AC                                                                     | Not available                                                                 | AC prevalence                                  |
| v Gossium, 2001 (cs) <sup>34</sup> | Adults              | CVC                                                                    | 228 (na; 0-23)                    | Any AC                                                                                                                 | 12 months                                                                     | AC prevalence                                  |
| Puiggros, 2012 (cs) <sup>31</sup>  | Adults              | Tunnelled CVC (77.6%), implanted port (22.4%)                          | 49 (16; 52)                       | Any AC (n=11, 22%); flushes with UFH (n=34, 69%)                                                                       | Mean 57.4 months (range 1-286)                                                | AC prevalence                                  |
| Olthof, 2014 (r) <sup>30</sup>     | Adults              | Hickman, port-a-cath                                                   | 212 (102; 48)                     | Any systemic AC                                                                                                        | Total: 600 catheter-year                                                      | AC prevalence                                  |
| Touré, 2014 (p) <sup>33</sup>      | Adults              | Broviac (n=133), 77 PICC (n=77)                                        | 196 (77, 56)                      | VKA, heparins                                                                                                          | Total: 134.6 catheter-year                                                    | AC prevalence                                  |
| Cuerda (p), 2015 <sup>34</sup>     | Adults              | Tunnelled (n=52), implanted port (n=10)                                | 62 (31, 50)                       | LMWH, low-dose VKA, VKA (target INR 2.0-2.5)                                                                           | Median: 1 year                                                                | AC prevalence                                  |

<sup>a</sup>Data are expressed as n total (n male, age or age range); age and age range are expressed in years, age is expressed as mean or median according to data available from original papers, p: prospective study, r: retrospective study; cs: cross-sectional study; PICC: peripherally inserted central venous catheter; PN: parenteral nutrition; RCT: randomised controlled trial; aPTT: activated partial thromboplastin time; IVH: intraventricular haemorrhage; CVC: central venous catheter; CRT: central venous catheter thrombosis; UFH: unfractionated heparin sodium; DIC: disseminated intravascular coagulation; AC: anticoagulant.

**Supplementary Table II** - Indications for parenteral nutrition in the included studies.

| Study                    | SBS      | Cancer  | IBDs    | Inf./Thr. | Dismotility | AIDS     | Radiation | Surgery   | Other   | Total n |
|--------------------------|----------|---------|---------|-----------|-------------|----------|-----------|-----------|---------|---------|
| Brismar <sup>14</sup>    | -        | 16 (32) | 17 (34) | -         | -           | -        | -         | -         | 17 (34) | 50      |
| Fabri <sup>16</sup>      | -        | -       | -       | -         | -           | -        | -         | -         | -       | 46      |
| Ruggiero <sup>19</sup>   | -        | -       | -       | -         | -           | -        | -         | -         | -       | 34      |
| Fabri <sup>15</sup>      | -        | -       | -       | -         | -           | -        | -         | -         | -       | 40      |
| Macoviak <sup>18</sup>   | -        | -       | -       | -         | -           | -        | -         | -         | -       | 37      |
| Kamala <sup>17</sup>     | -        | -       | -       | -         | -           | -        | -         | -         | -       | 68      |
| Uslu <sup>20</sup>       | -        | -       | -       | -         | -           | -        | -         | -         | -       | 239     |
| Ladefoged <sup>28</sup>  | 26 (37)  | -       | -       | -         | -           | -        | -         | -         | 44 (63) | 70      |
| Schmidt <sup>32</sup>    | 8 (23)   | -       | 26 (74) | -         | 1 (3)       | -        | -         | -         | -       | 35      |
| Dollery <sup>25</sup>    | -        | -       | 15 (44) | -         | 7 (21)      | -        | -         | 10 (29.4) | 2 (6)   | 34      |
| Andrew <sup>21</sup>     | 3 (25)   | -       | -       | -         | 1 (8)       | -        | -         | -         | 8 (67)  | 12      |
| Newall <sup>29</sup>     | -        | -       | 2 (25)  | -         | 1 (12)      | -        | -         | -         | 5 (62)  | 8       |
| Vegting <sup>36</sup>    | 10(22)   | -       | -       | -         | 15 (33)     | -        | -         | -         | 20 (44) | 45*     |
| Imperial <sup>27</sup>   | -        | -       | -       | -         | -           | -        | -         | -         | -       | 1,010   |
| Bern <sup>22</sup>       | -        | 1 (4)   | 9 (39)  | 5 (22)    | 1 (4)       | -        | 4 (17)    | -         | 3 (13)  | 23      |
| Veerabagu <sup>35</sup>  | -        | 12 (13) | 17 (19) | 21 (23)   | -           | -        | 6 (7)     | 8 (9)     | 26 (29) | 90      |
| Duerksen <sup>26</sup>   | -        | -       | -       | -         | -           | 47 (100) | -         | -         | -       | 47      |
| Cowl <sup>23</sup>       | 10 (10)  | 16 (16) | 12 (12) | 1 (1)     | -           | -        | -         | 17 (17)   | 56 (55) | 102     |
| Van Gossum <sup>34</sup> | -        | -       | 75 (33) | 57 (25)   | 18 (78)     | -        | -         | 43 (19)   | 23 (10) | 228     |
| Puiggros <sup>31</sup>   | -        | 8 (16)  | 1 (2)   | 10 (20)   | 10 (20)     | -        | 10 (20)   | 4 (8)     | 6 (12)  | 49      |
| Oltho <sup>30</sup>      | (58-60)  | -       | -       | -         | (28-37)     | -        | -         | -         | (4-5)   | 212     |
| Touré <sup>33</sup>      | 101 (52) | 32 (16) | 13 (7)  | 55 (28)   | 12 (6)      | -        | 22 (11)   | 84 (43)   | 52 (27) | 196     |
| Cuerda <sup>24</sup>     | -        | -       | 8 (13)  | 13 (21)   | 11 (18)     | -        | 10 (16)   | 8 (13)    | 12 (19) | 62      |

Data are expressed as number and (percentages). \*Thirteen patients were included in both groups (n=32). SBS: short bowel syndrome, IBD: inflammatory bowel disease; AIDS: acquired immunodeficiency syndrome; Inf./Thr.: infarction/splanchnic thrombosis.
